# Supplementary material for: A chemosensor for micro- to nano-molar detection of Ag+ and Hg2+ ions in pure aqueous media and its applications in cell imaging
Source: Royal Society of Chemistry journal article supplement (doi:10.1039/c7dt02524f), 2017-01-01
Supplement: c7dt02524f3.pdf [file c7dt02524f3.pdf]

## Supporting Information

### **Chemosensor for micro to nano-molar detection of Ag<sup>+</sup> and Hg<sup>2+</sup> ions in pure aqueous media and its applications in cell imaging**

Jitendra P. Nandre<sup>a</sup>, Samadhan R. Patil<sup>a</sup>, Suban K. Sahoo<sup>c</sup>, Chullikkattil P. Pradeep<sup>d</sup>, Andrei Churakov<sup>e</sup>, Fabio

Yu<sup>f</sup>, Lingxin Chen<sup>\*f</sup>, Carl Redshaw<sup>g</sup>, Ashok A. Patil<sup>a\*</sup>, Umesh D. Patil<sup>\*b</sup>

<sup>a</sup>*Department of Chemistry, Z. B. Patil College, Deopur, Dhule - 424 002 (MS), India.*

<sup>b</sup>*Department of Chemistry, S.S.V.P.S's L. K. Dr. P. R. Ghogrey Science College, Dhule-424 001 (MS), India.*

<sup>c</sup>*Department of Applied Chemistry, S. V. National Institute Technology, Surat-395007, Gujrat, India.*

<sup>d</sup>*School of Basic Sciences, Indian Institute of Technology Mandi, Mandi, Himachal Pradesh, 175001, India.*

<sup>e</sup>*Institute of General and Inorganic Chemistry, Russian Academy of Sciences, Leninskii prosp. 31, Moscow 119991, Russian Federation.*

<sup>f</sup>*Key Laboratory of Coastal Zone Environmental Processes and Ecological Remediation, Yantai Institute of Coastal Zone Research, Chinese Academy of Sciences, Yantai 264003, China*

<sup>g</sup>*Department of Chemistry, University of Hull, Cottingham Road, Hull, HU6 7RX (UK).*

## Table of Contents

|             |                                                                                                                         |
|-------------|-------------------------------------------------------------------------------------------------------------------------|
| Figure S-1  | : FT-IR spectrum of sensor PTB-1.                                                                                       |
| Figure S-2  | : $^1\text{H}$ -NMR spectrum of sensor PTB-1                                                                            |
| Figure S-3  | : $^{13}\text{C}$ -NMR spectrum of sensor PTB-1                                                                         |
| Figure S-4  | : HRMS spectrum of sensor PTB-1                                                                                         |
| Figure S-5  | : Concentration dependent naked-eye study                                                                               |
| Figure S-6  | : Linear fitting curve for LOD and LOQ determination of PTB-1 for $\text{Ag}^+$                                         |
| Figure S-7  | : Mole ratio plot/change in absorption spectra ( $\Delta A$ ) as a function of concentration of $\text{Ag}^+$ ions      |
| Figure S-8  | : Mass spectrum of PTB-1 in the presence of $\text{Ag}^+$                                                               |
| Figure S-9  | : Benesi-Hildebrand plot of $1/\Delta A$ against $1/[\text{Ag}^+]$                                                      |
| Figure S-10 | : Job's plot for complexation of PTB-1 with $\text{Hg}^{2+}$ ion                                                        |
| Figure S-11 | : Mole ratio plot/change in emission spectra ( $\Delta F$ ) as a function of concentration of $\text{Hg}^{2+}$ ion      |
| Figure S-12 | : Mass spectrum of PTB-1 in the presence of $\text{Hg}^{2+}$                                                            |
| Figure S-13 | : Benesi-Hildebrand plot of $1/\Delta F$ against $1/[\text{Hg}^{2+}]$                                                   |
| Figure S-14 | : Plots of the fluorescence intensity of PTB-1 vs. the increasing concentration of $\text{Hg}^{2+}$ and $\text{Ag}^+$ . |
| Figure S-15 | : Selectivity and reversibility measurement of PTB-1 to $\text{Hg}^{2+}$ and $\text{Ag}^+$ .                            |
| Figure S-16 | : The DFT computed molecular structure of <b>PTB-1</b> and its complexes.                                               |
| Figure S-17 | : Partial $^1\text{H}$ NMR spectra of receptor PTB-1 in the presence of $\text{HgCl}_2$                                 |
| Figure S-18 | : Partial $^1\text{H}$ NMR spectra of receptor PTB-1 in the presence of $\text{AgNO}_3$                                 |
| Figure S-19 | : FT-IR overlap spectra of PTB-1 and PTB-1+ $\text{Hg}^{2+}$ complex                                                    |
| Figure S-20 | : Photographs of PTB-1 loaded test strips with varying concentration of $\text{Ag}^+$                                   |
| Figure S-21 | : Fluorescence stability of PTB-1                                                                                       |
| Figure S-22 | : MTT assay of HepG2 cells with different concentrations of PTB-1.                                                      |
| Figure S-23 | : Hydrogen-bonded centrosymmetric dimers in the structure of PTB-1.                                                     |
| Table S-1   | : Comparison of PTB-1 with previously reported sensors                                                                  |

## Experimental Section

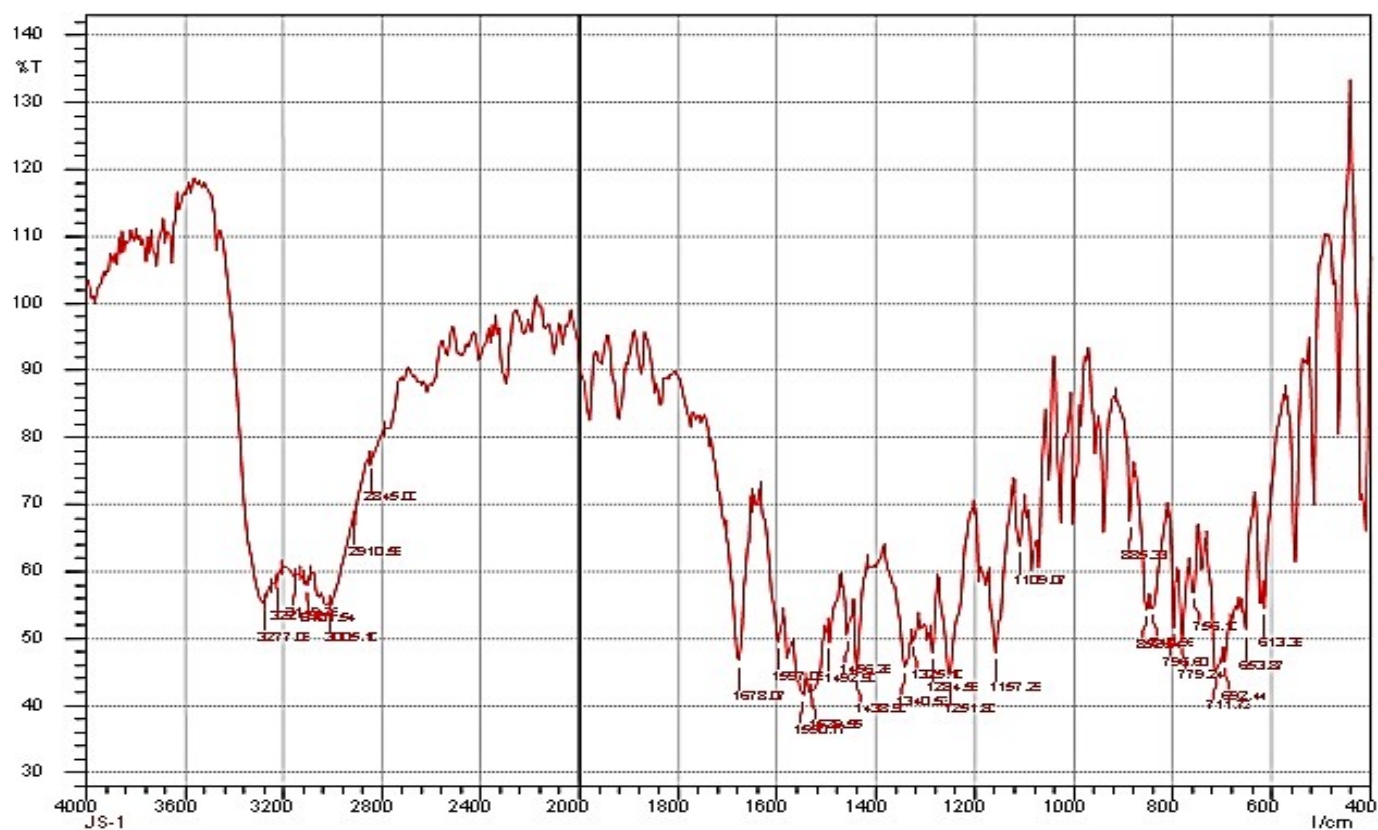

Figure S-1: FT-IR spectrum of sensor PTB-1.

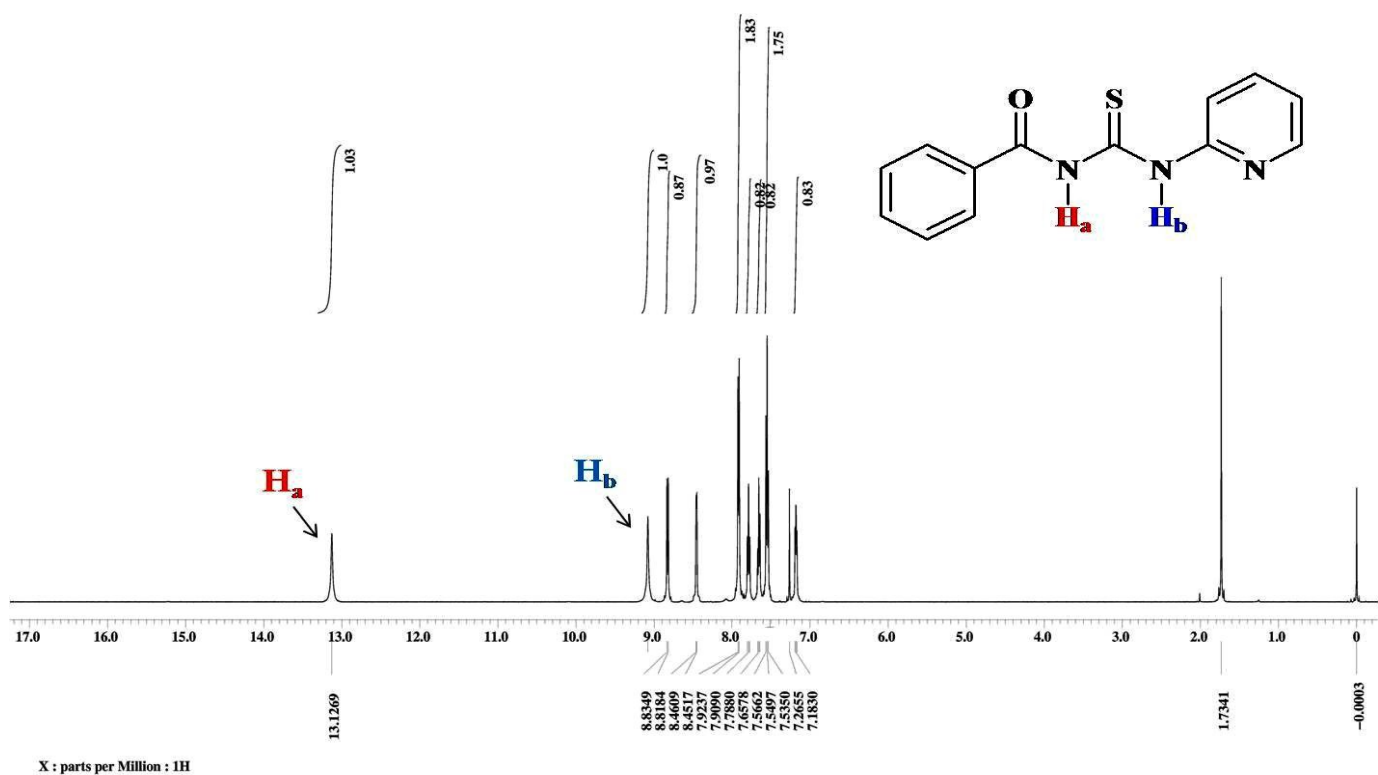

**Figure S-2:**  $^1\text{H}$ -NMR spectrum of sensor **PTB-1**.

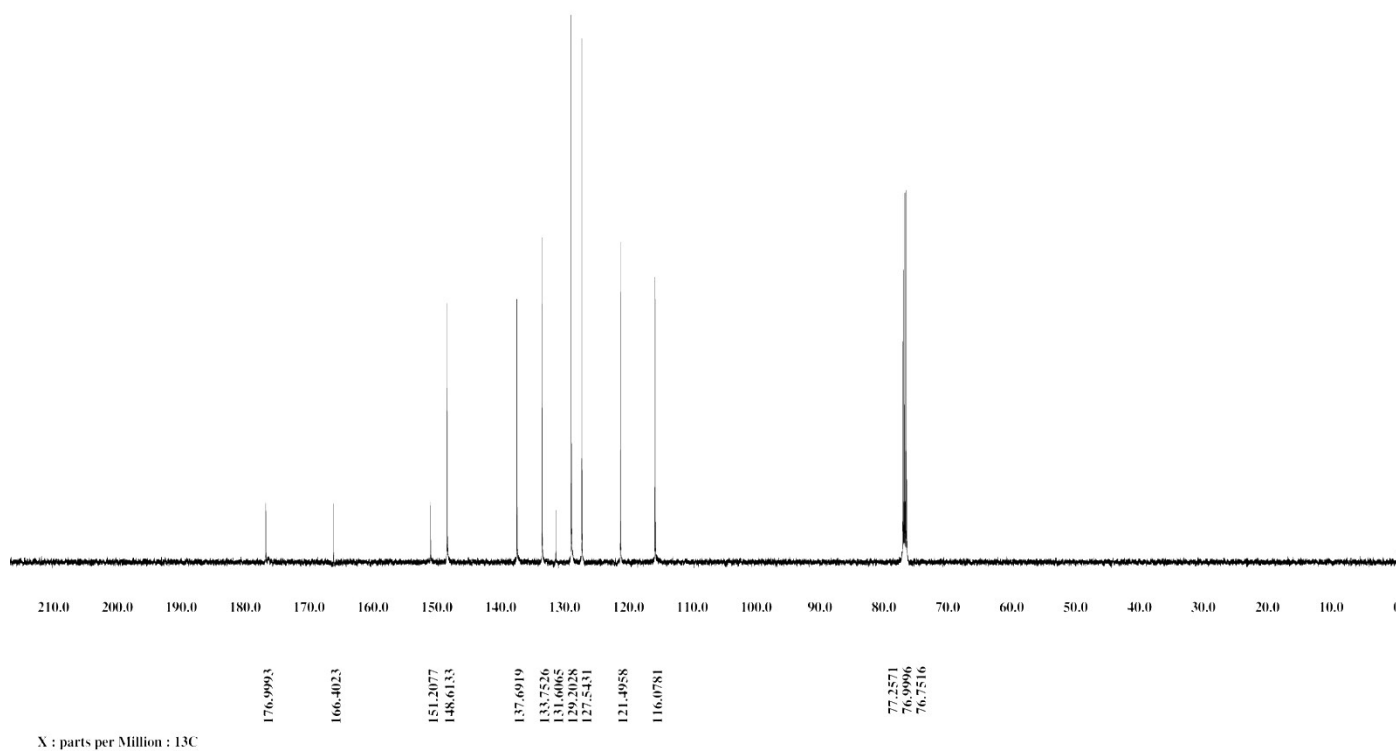

**Figure S-3:**  $^{13}\text{C}$ -NMR spectrum of sensor **PTB-1**

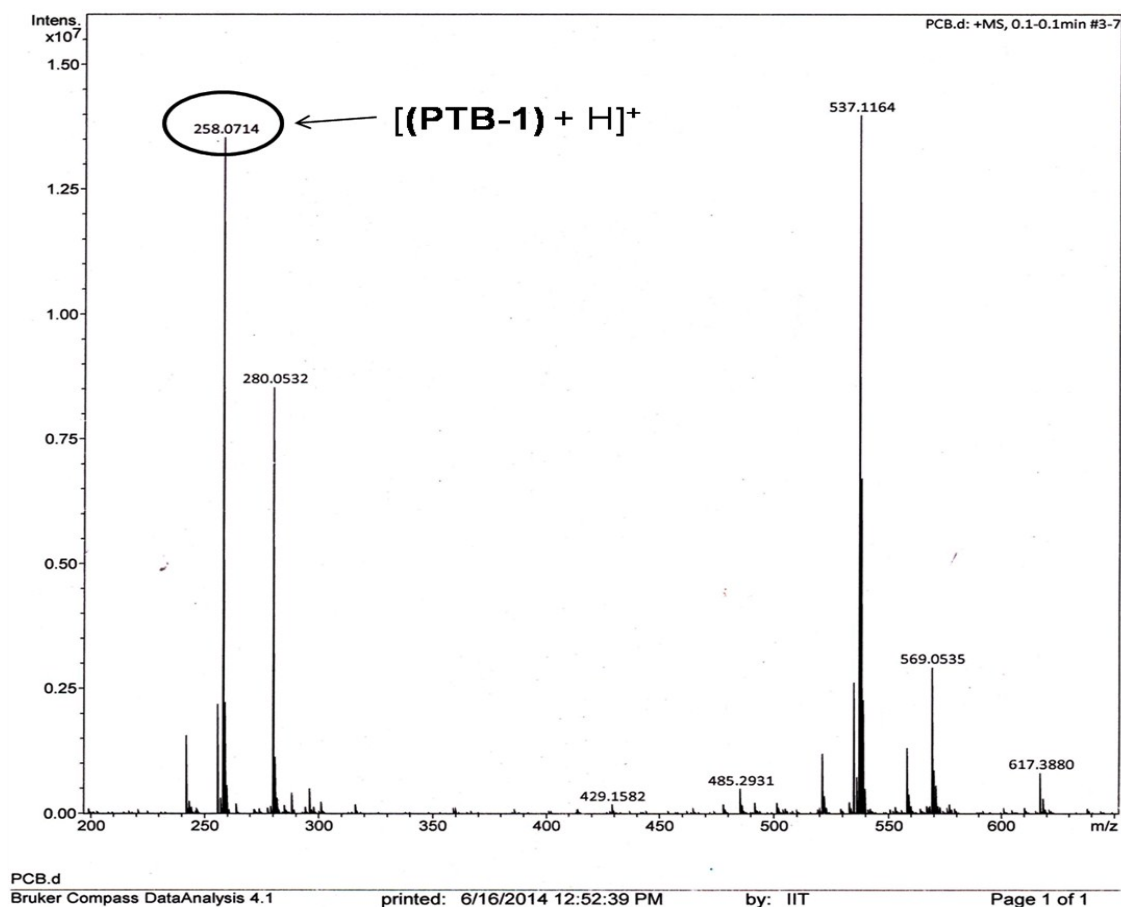

**Figure S-4:** HRMS spectrum of sensor **PTB-1**.

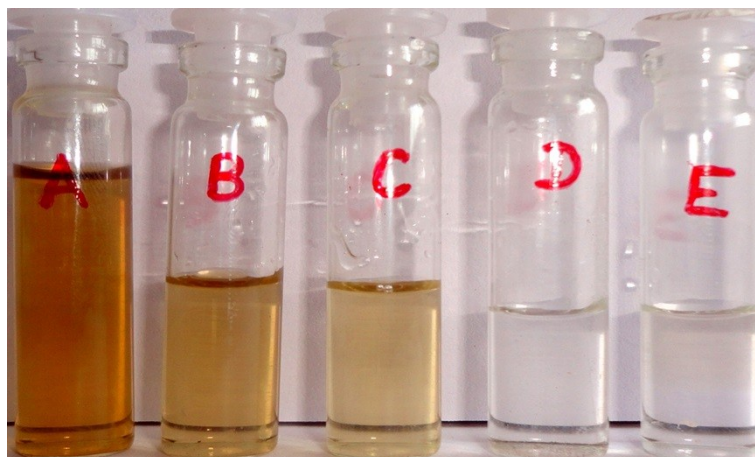

**Figure S-5:** Concentration dependent naked-eye study; 2 equivalents of  $\text{Ag}^+$  ions of concentrations (A)  $\text{Ag}^+$  ( $5 \times 10^{-3} \text{ M}$ ); (B)  $\text{Ag}^+$  ( $1 \times 10^{-3} \text{ M}$ ); (C)  $\text{Ag}^+$  ( $5 \times 10^{-4} \text{ M}$ ); (D)  $\text{Ag}^+$  ( $1 \times 10^{-4} \text{ M}$ ); (E)  $\text{Ag}^+$  ( $1 \times 10^{-5} \text{ M}$ ) in the presence of 1 equivalent of **PTB-1** ( $5 \times 10^{-3} \text{ M}$ ).

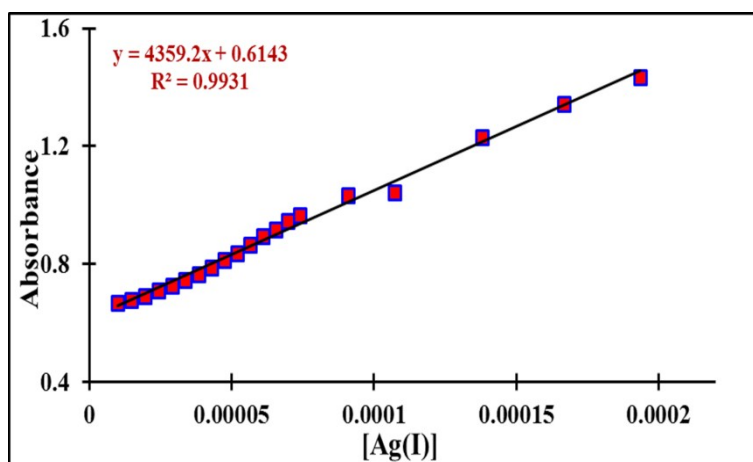

**Figure S-6:** Linear fitting curve for LOD and LOQ determination of **PTB-1** for  $\text{Ag}^+$ .

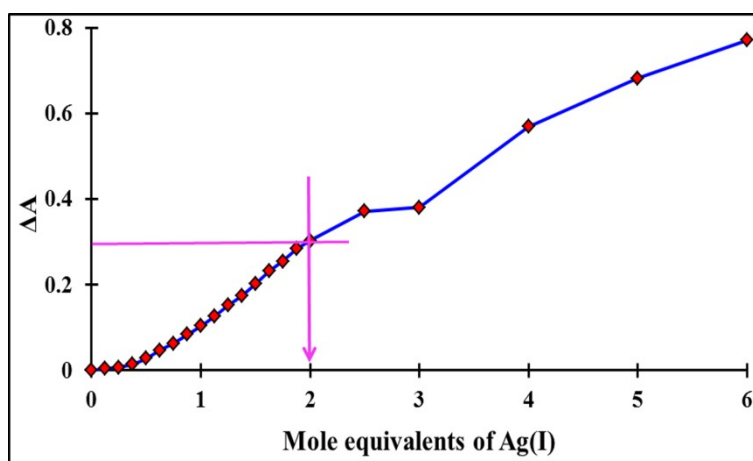

**Figure S-7:** Mole ratio plot/change in absorption spectra ( $\Delta A$ ) as a function of concentration of  $\text{Ag}^+$  ions.

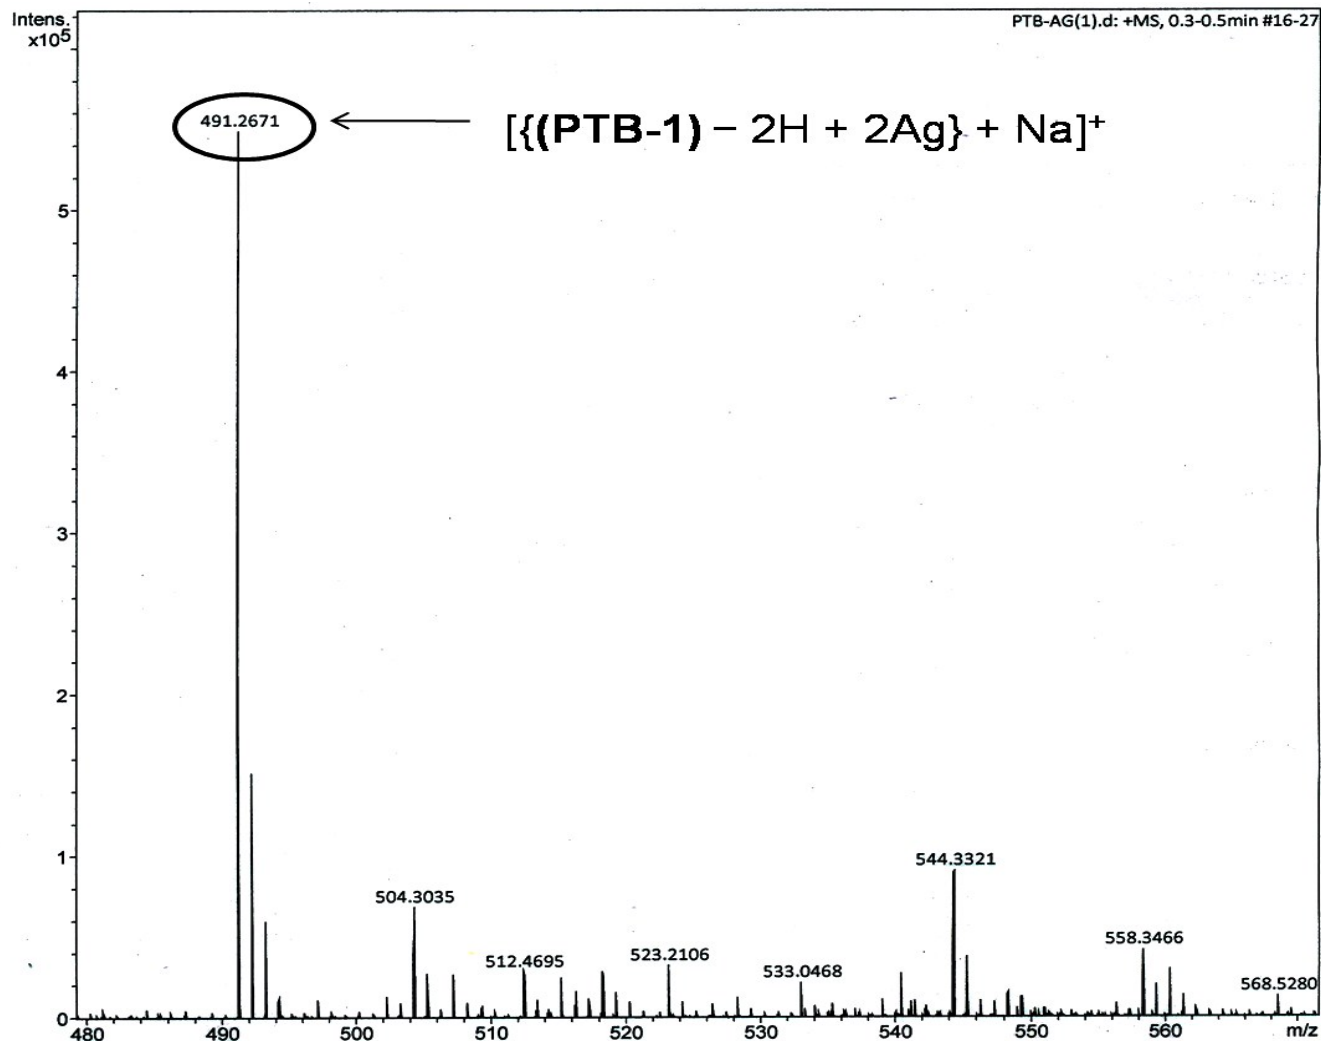

PTB-AG(1).d

Bruker Compass DataAnalysis 4.1

printed: 7/17/2014 10:31:14 AM

by: IIT

Page 1 of 1

**Figure S-8:** Mass spectrum of **PTB-1** in the presence of  $Ag^+$ .

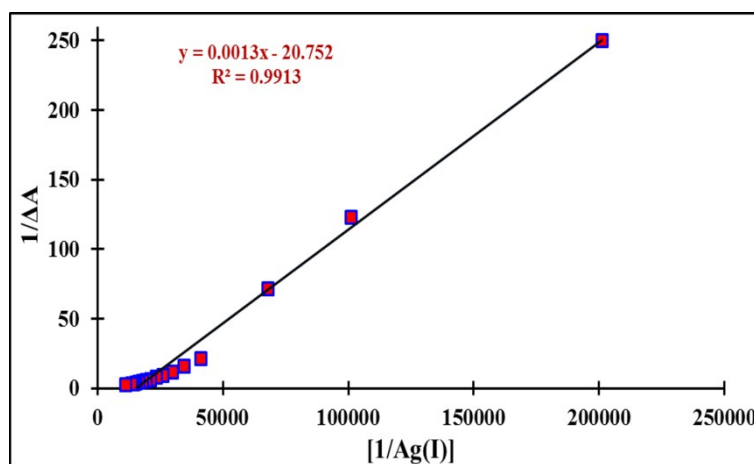

**Figure S-9:** Benesi-Hildebrand plot of  $1/\Delta A$  against  $1/[Ag^+]$ .

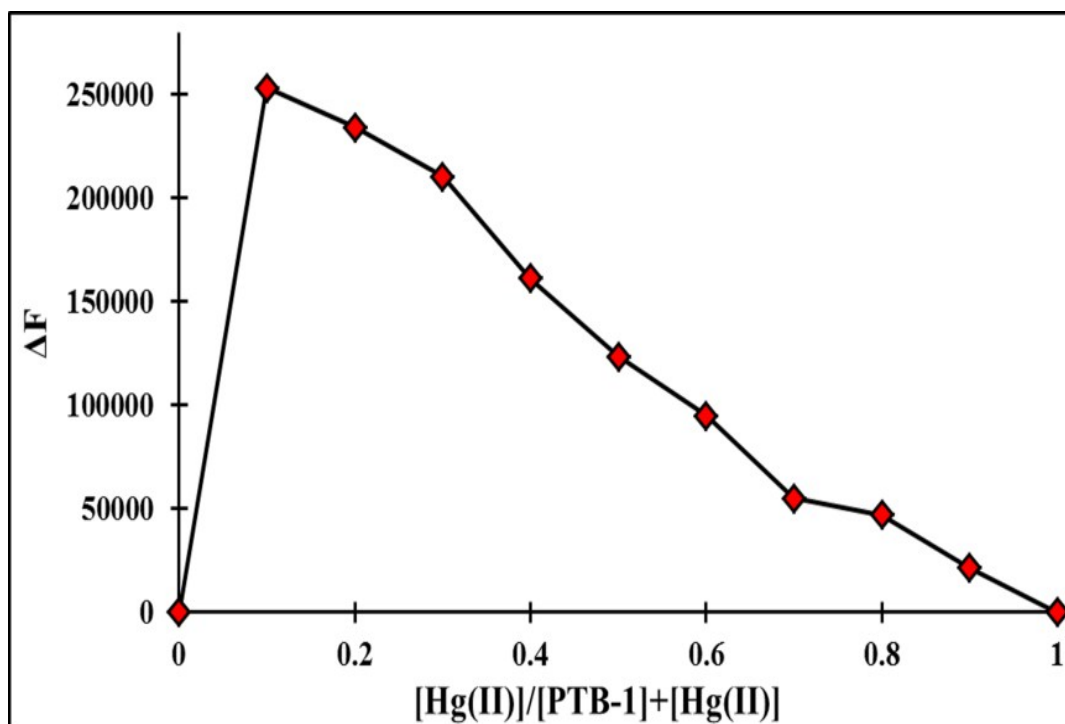

**Figure S-10:** Job's plot for the determination of the 2:1 stoichiometry for complexation of **PTB-1** with  $\text{Hg}^{2+}$  ion.

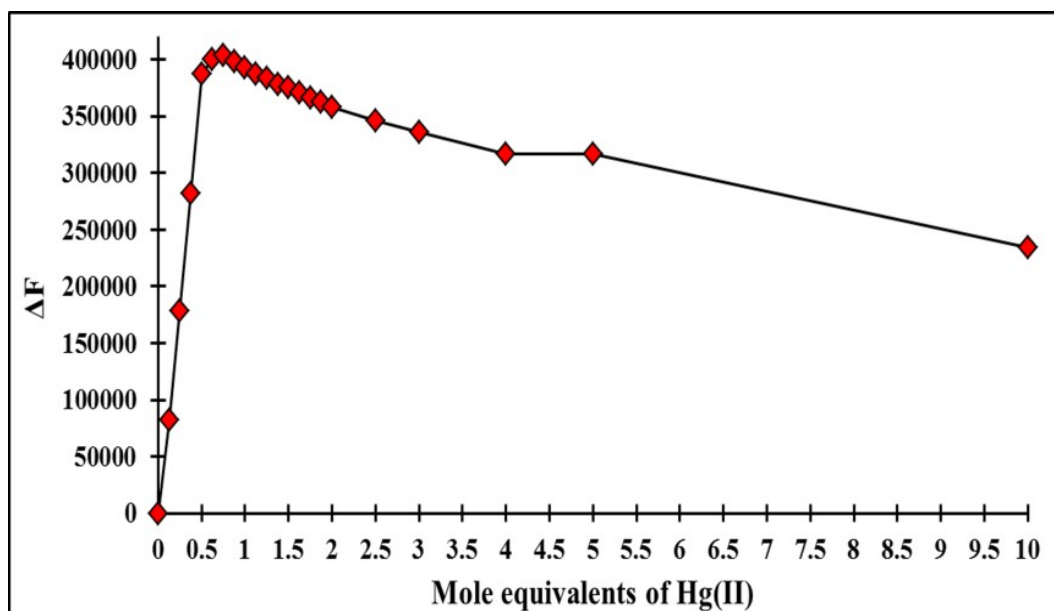

**Figure S-11:** Mole ratio plot/change in emission spectra ( $\Delta F$ ) as a function of concentration of  $\text{Hg}^{2+}$  ion.

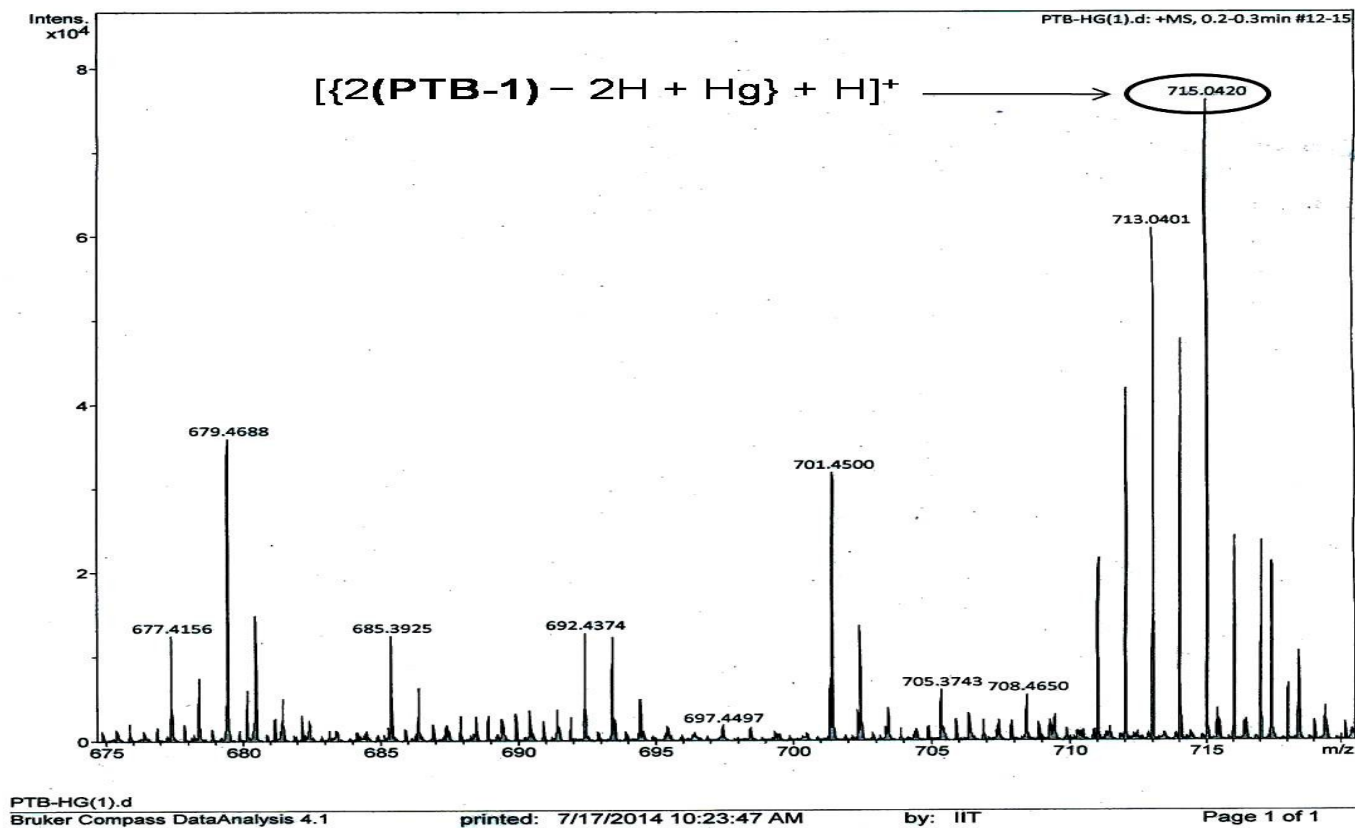

**Figure S-12:** Mass spectrum of PTB-1 in the presence of  $\text{Hg}^{2+}$ .

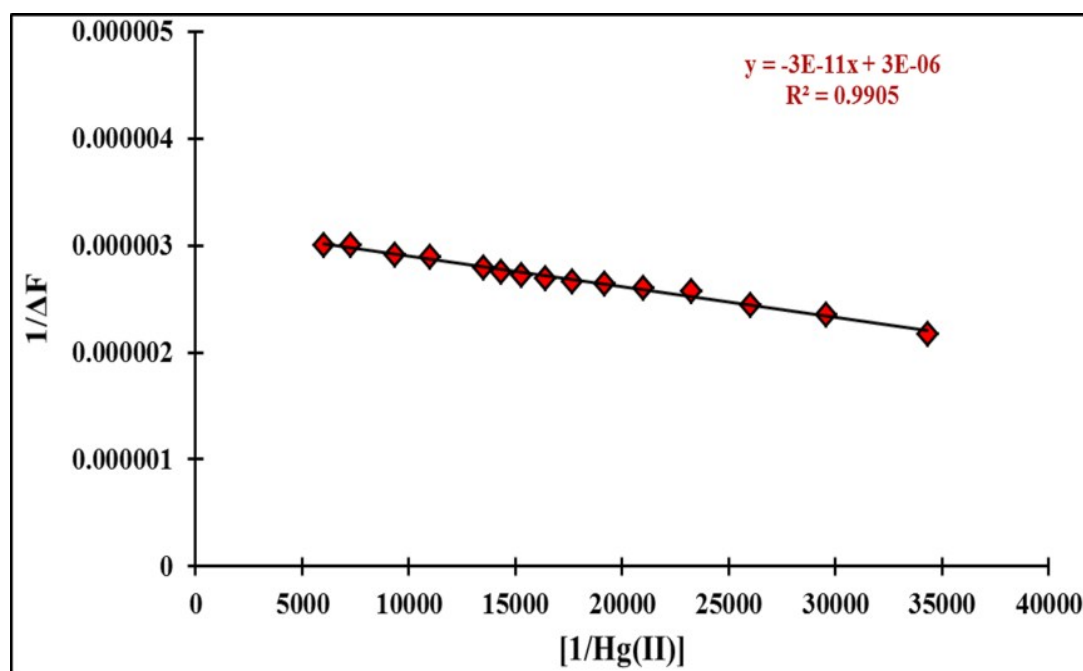

**Figure S-13:** Benesi-Hildebrand plot of  $1/\Delta F$  against  $1/[\text{Hg}^{2+}]$ .



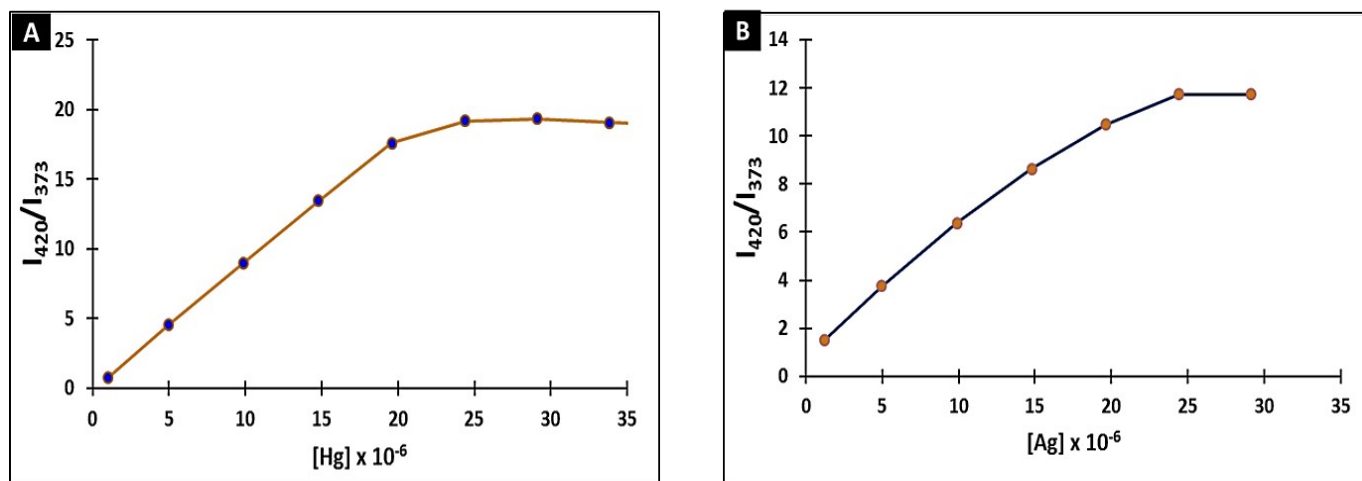

**Figure S14:** Plots of the fluorescence intensity of PTB-1 vs. the increasing concentration of (A) Hg<sup>2+</sup> and (B) Ag<sup>+</sup>.

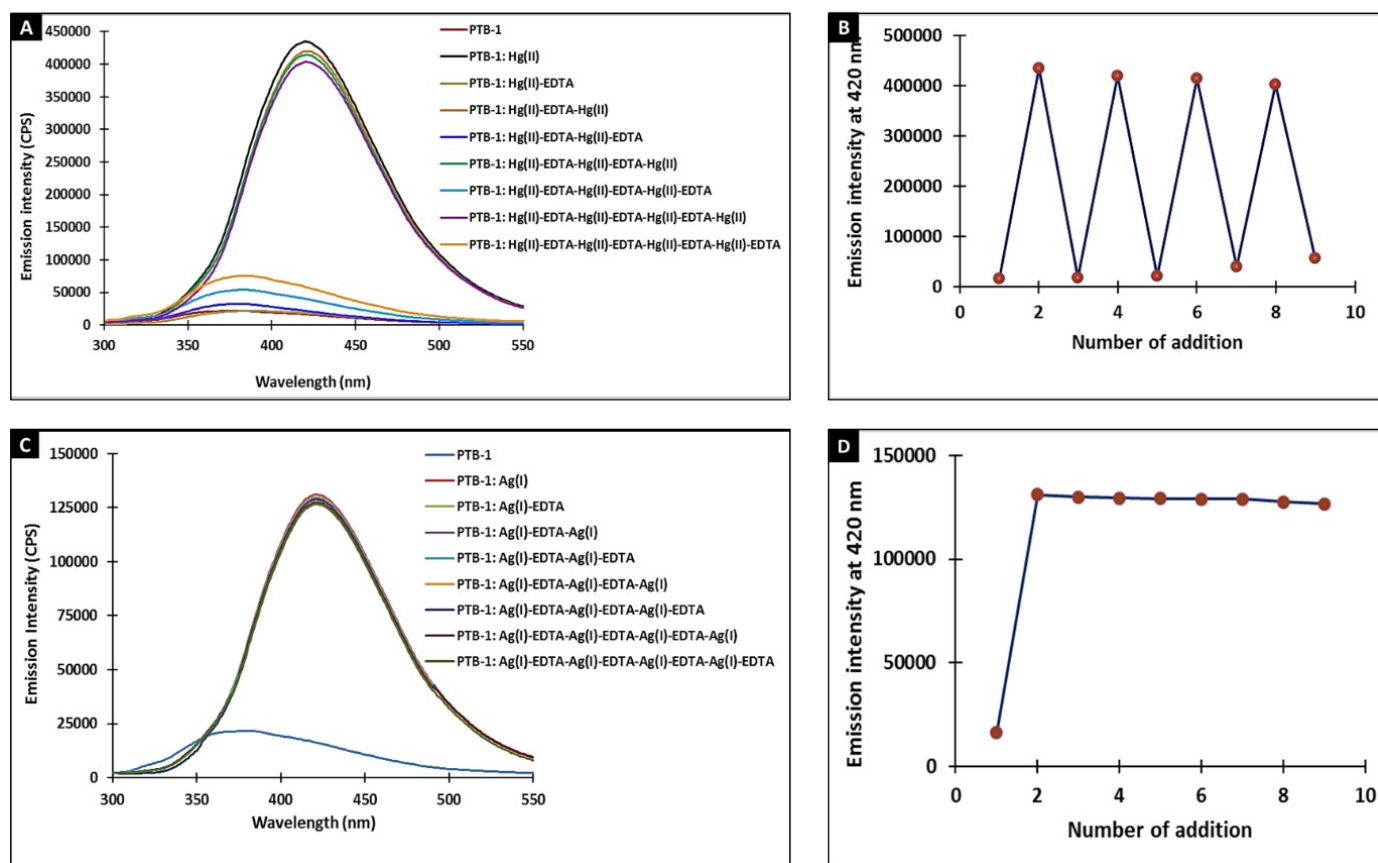

**Figure S15:** Selectivity and reversibility measurement of PTB-1 to Hg<sup>2+</sup> and Ag<sup>+</sup>.

Changes in fluorescence emission intensity of PTB-1 [2 mL, 4 × 10<sup>-5</sup> M, in CH<sub>3</sub>OH:H<sub>2</sub>O (20:80, v/v)] upon the sequential addition of (A, B) Hg<sup>2+</sup> and EDTA; (C, D) Ag<sup>+</sup> and EDTA at  $\lambda_{\text{ex}}$  = 290 nm.

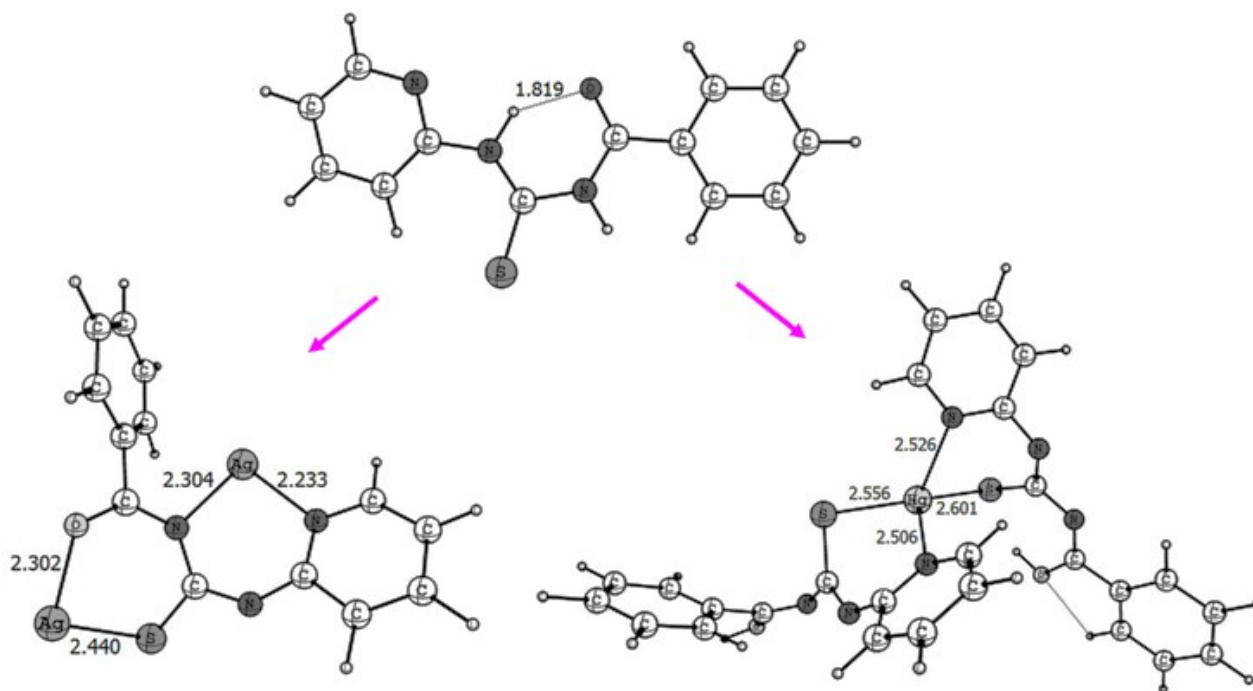

**Figure S16:** The DFT computed molecular structure of **PTB-1** and its **PTB-1.(Ag<sup>+</sup>)<sub>2</sub>** and **(PTB-1)<sub>2</sub>.Hg<sup>2+</sup>** complexes.

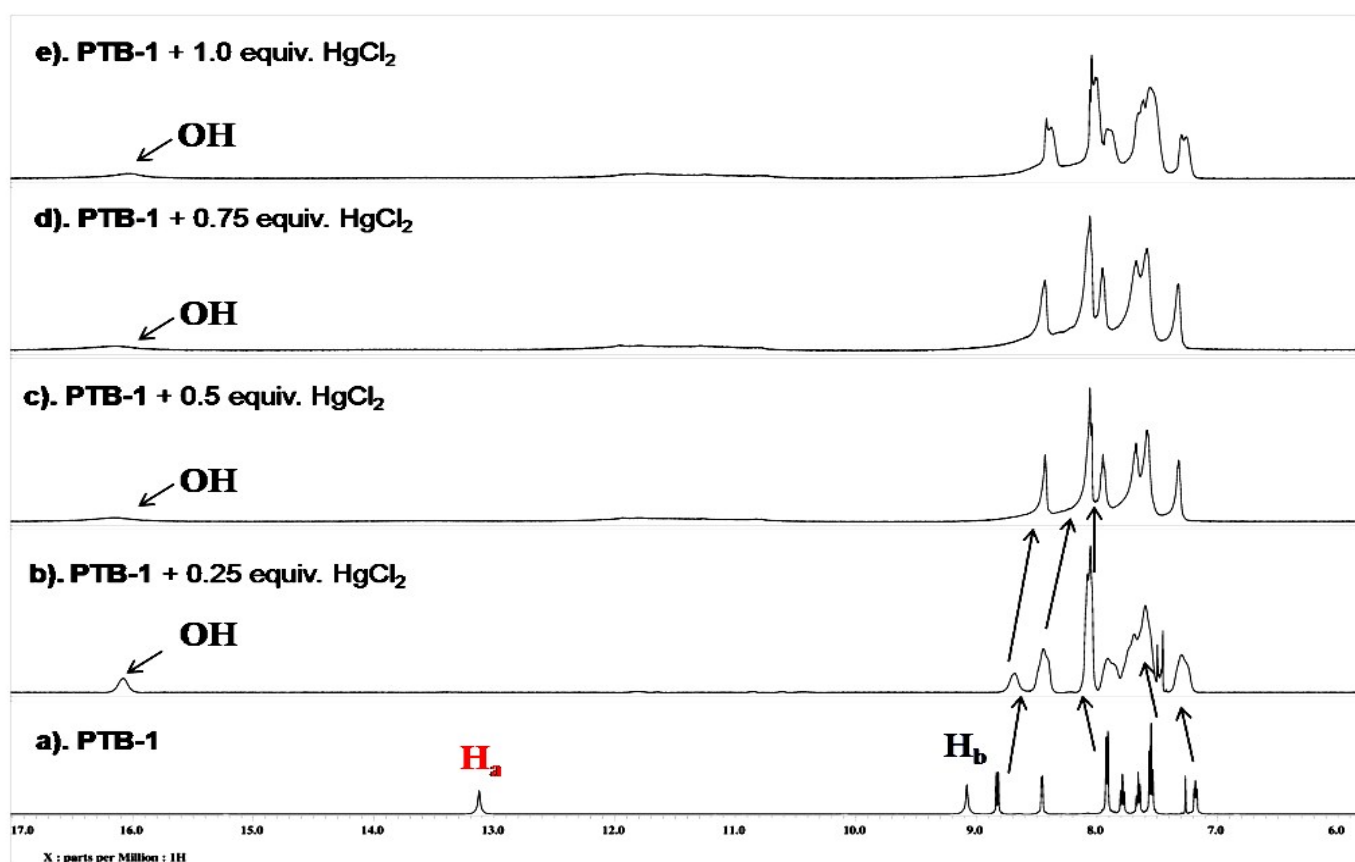

**Figure S-17:** Partial <sup>1</sup>H NMR spectra (aromatic region) of receptor **PTB-1** (a), **PTB-1** in the presence of 0.25 equiv. HgCl<sub>2</sub> (b), 0.5 equiv. HgCl<sub>2</sub> (c) and 1.0 equiv. HgCl<sub>2</sub> (d) taken in CDCl<sub>3</sub>.

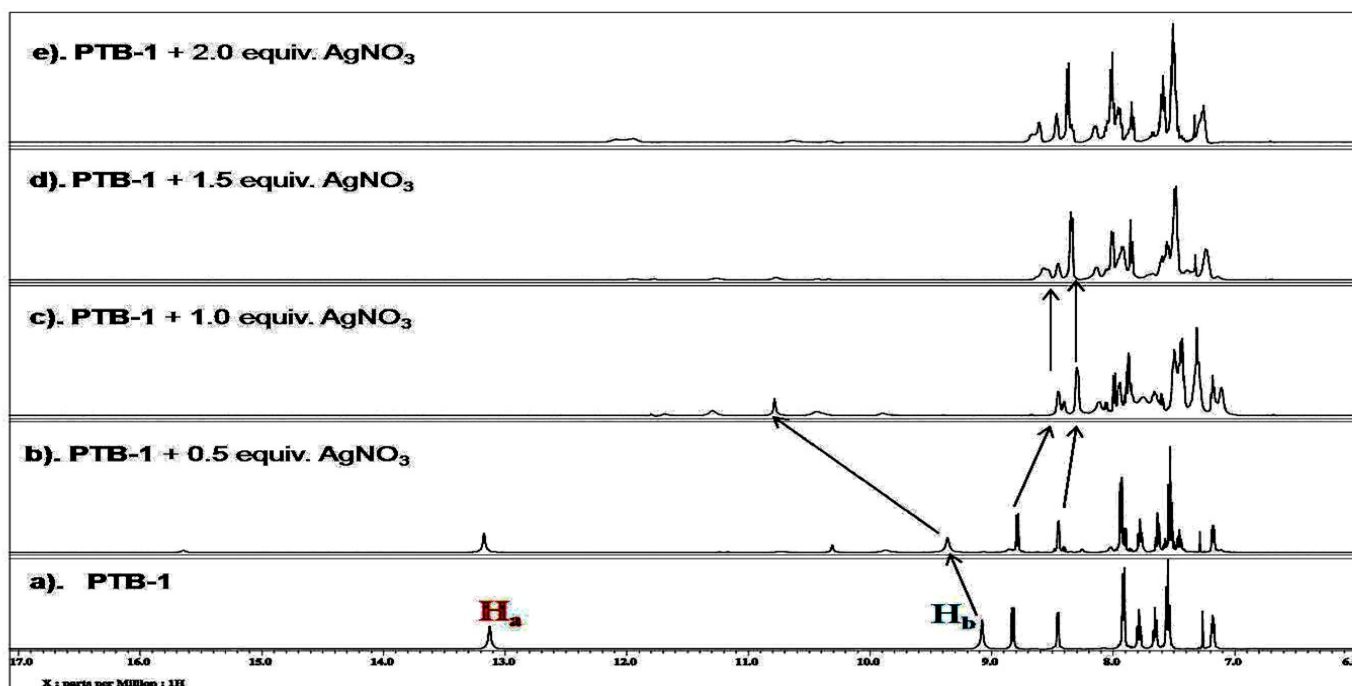

**Figure S-18:** Partial  $^1\text{H}$  NMR spectra of receptor **PTB-1** (a), **PTB-1** in the presence of 0.5 equiv.  $\text{AgNO}_3$  (b), 1.0 equiv.  $\text{AgNO}_3$  (c), 1.5 equiv.  $\text{AgNO}_3$  (d) and 2.0 equiv.  $\text{AgNO}_3$  (e) taken in  $\text{CDCl}_3$ .

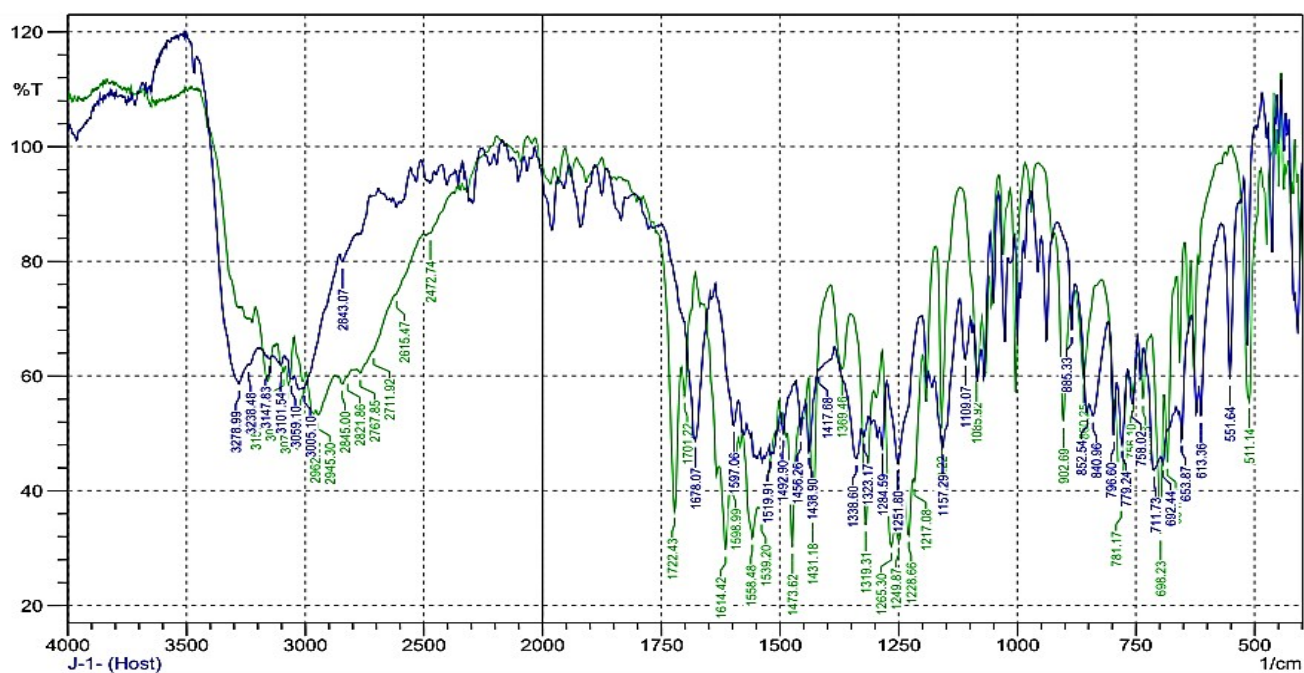

**Figure S-19:** FT-IR overlap spectra of **PTB-1** (blue color) and **PTB-1**+ $\text{Hg}^{2+}$  complex (green color).

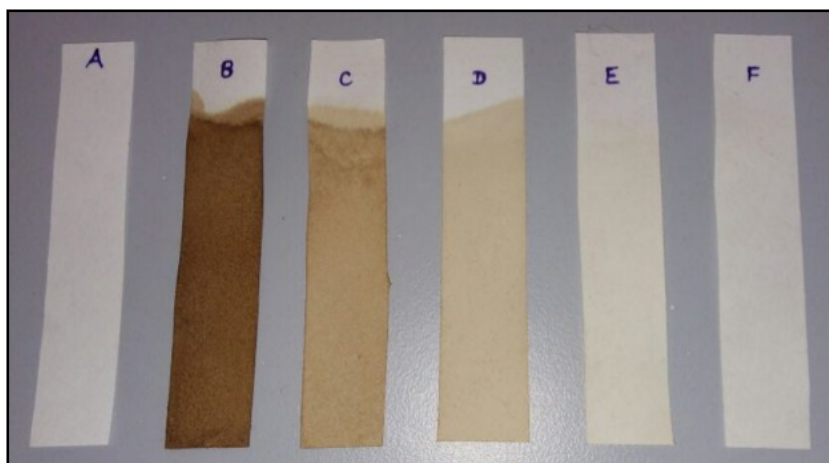

**Figure 20:** Photographs of PTB-1 loaded test strips with varying concentration of  $\text{Ag}^+$

A= PTB-1 ( $1 \times 10^{-2}$  M) loaded test strip and  $[\text{Ag}^+]$ : B =  $1 \times 10^{-4}$  M, C =  $5 \times 10^{-5}$  M, D =  $1 \times 10^{-5}$  M, E =  $5 \times 10^{-6}$  M, F =  $1 \times 10^{-6}$  M

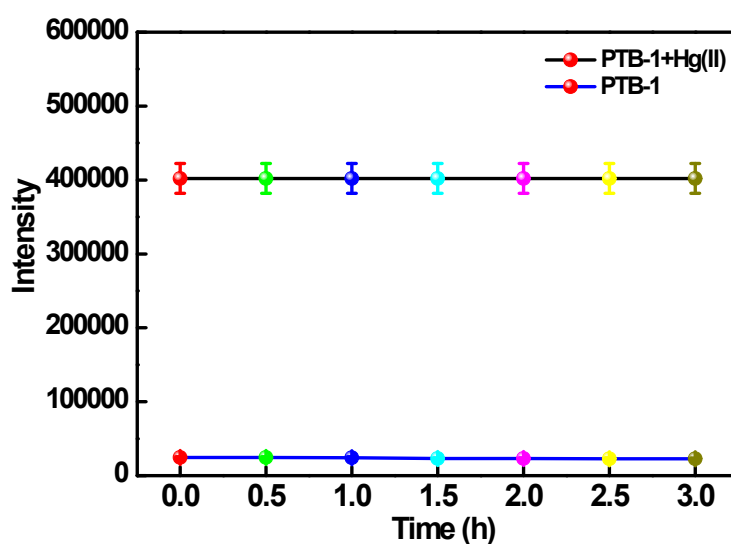

**Figure S21:** Fluorescence stability of PTB-1 [(2 mL,  $4 \times 10^{-5}$  M) in  $\text{CH}_3\text{OH}:\text{H}_2\text{O}$  (20:80, v/v)] upon 0 - 3 h.  $\lambda_{\text{ex}}$  = 290 nm,  $\lambda_{\text{em}}$  = 420 nm. The data were shown as mean ( $\pm$  s.d.) ( $n = 7$ ).

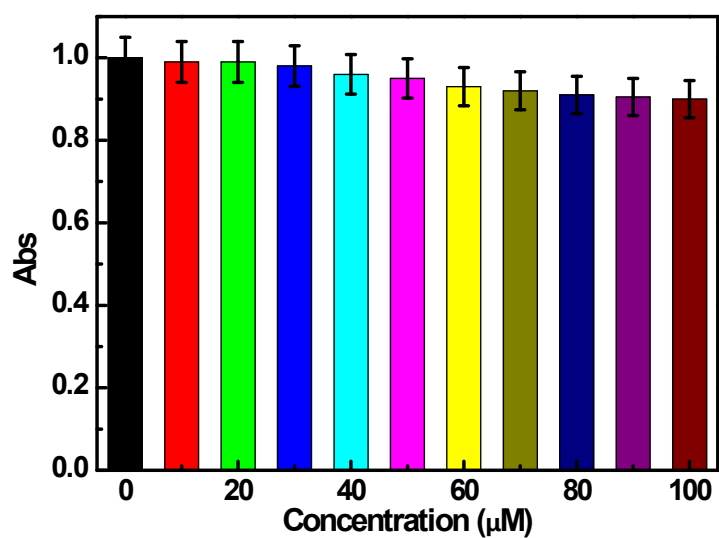

**Figure S22:** MTT assay of HepG2 cells with different concentrations of PTB-1. The data were shown as mean ( $\pm$  s.d.) ( $n = 7$ ).

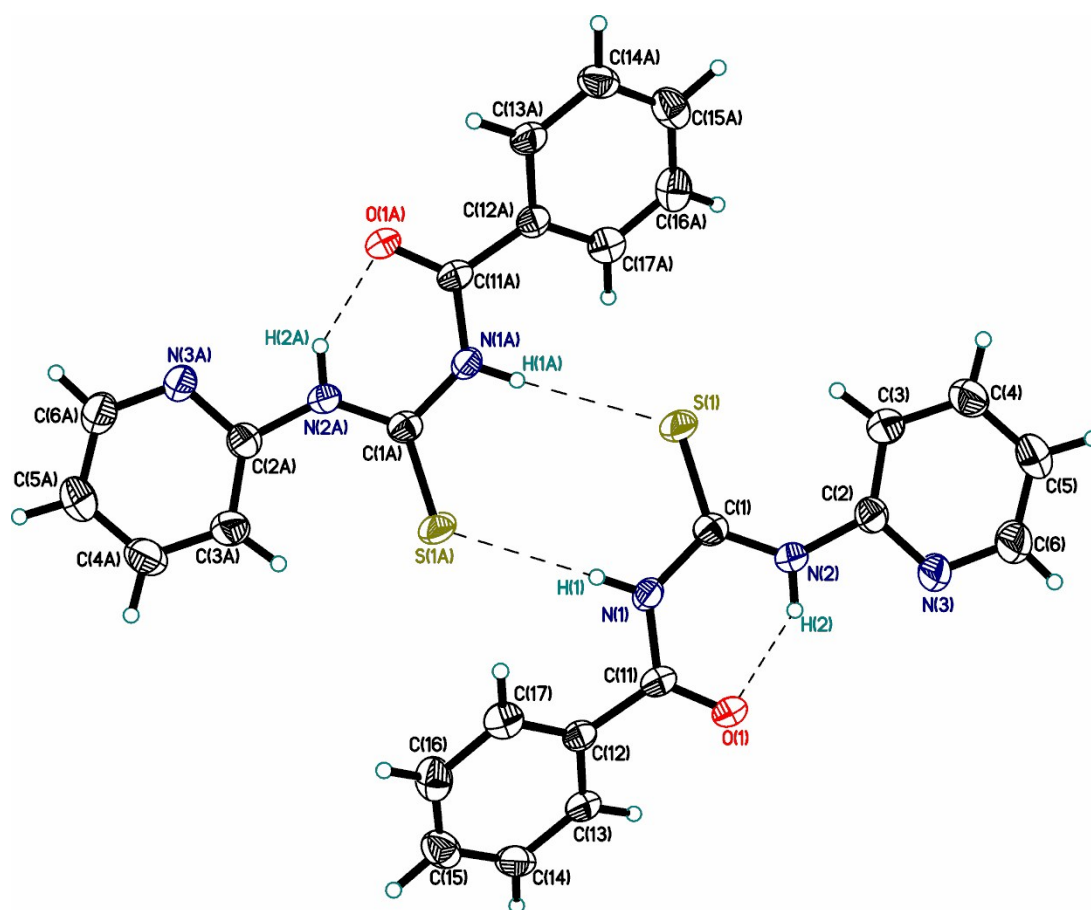

**Figure S-23:** Hydrogen-bonded centrosymmetric dimers in the structure of PTB-1.

**Table S-1** Comparison of **PTB-1** with previously reported sensors.

| Research Group                             | Selectivity for                      | Solvent for analysis       | Detection limit                                                                                     | Application                                        |
|--------------------------------------------|--------------------------------------|----------------------------|-----------------------------------------------------------------------------------------------------|----------------------------------------------------|
| Patil, U.D. <i>et. al.</i><br>(This paper) | Ag <sup>+</sup> and Hg <sup>2+</sup> | Methanol:water (20:80)     | For Ag <sup>+</sup> : 3.67 x 10 <sup>-6</sup> M<br>For Hg <sup>2+</sup> : 0.69 x 10 <sup>-9</sup> M | Cell Imaging,<br>Paper Strips,<br>Supported Silica |
| Fu, Y. <i>et. al.</i>                      | Only Ag <sup>+</sup>                 | THF:water (80:20)          | 2.92 x 10 <sup>-7</sup> M and<br>6.5 x 10 <sup>-7</sup> M                                           | --                                                 |
| Hatai, J. <i>et. al.</i>                   | Only Hg <sup>2+</sup>                | Methanol:water (80:20)     | 1.03 x 10 <sup>-7</sup> M                                                                           | --                                                 |
| Hatai, J. <i>et. al.</i>                   | Only Ag <sup>+</sup>                 | DMSO:water (1:99)          | 1.0 x 10 <sup>-7</sup> M                                                                            | Cell Imaging,<br>Paper Strips                      |
| Hu, Z.Q. <i>et. al.</i>                    | Only Hg <sup>2+</sup>                | Ethanol:water (11:89)      | 4.2 x 10 <sup>-8</sup> M                                                                            | Cell Imaging                                       |
| Mahapatra, A.K. <i>et. al.</i>             | Only Hg <sup>2+</sup>                | Acetonitrile:water (20:80) | 4.0 x 10 <sup>-7</sup> M                                                                            | Cell Imaging                                       |
| Tang, B. <i>et. al.</i>                    | Only Hg <sup>2+</sup>                | Acetonitrile               | 1.39 x 10 <sup>-8</sup> M                                                                           | Cell Imaging                                       |
| Vedamalai, M. <i>et. al.</i>               | Only Hg <sup>2+</sup>                | Acetonitrile:water (90:10) | 0.226 x 10 <sup>-6</sup> M                                                                          | Cell Imaging                                       |
| Wang, Y. <i>et. al.</i>                    | Only Ag <sup>+</sup>                 | Ethanol:water (10:90)      | 2.79x10 <sup>-7</sup> M                                                                             | --                                                 |
| Xiang, G. <i>et. al.</i>                   | Only Ag <sup>+</sup>                 | THF                        | 5 x 10 <sup>-8</sup> M                                                                              | --                                                 |
| Ye, J.H. <i>et. al.</i>                    | Only Ag <sup>+</sup>                 | THF:water (33:66)          | 0.2 x 10 <sup>-6</sup> M                                                                            | --                                                 |
| Zhang, D. <i>et. al.</i>                   | Only Hg <sup>2+</sup>                | Ethanol:water (50:50)      | 0.067 x 10 <sup>-6</sup> M                                                                          | Cell Imaging                                       |
| Zheng, H. <i>et. al.</i>                   | Only Ag <sup>+</sup>                 | Methanol:water (20:80)     | 34 x 10 <sup>-9</sup> M                                                                             | --                                                 |

## References

- Fu, Y., Mu, L., Zeng, X., Zhao, J.L., Redshaw, C., Ni, X.L., Yamato, T., 2013. J. Chem. Soc., Dalton Trans. 42, 3552-3560.
- Hatai, J., Pal, S., Bandyopadhyay, S., 2012. RSC Adv. 2, 10941-10947.
- Hatai, J., Pal, S., Jose, G.P., Bandyopadhyay, S., 2012. Inorg. Chem. 51, 10129-10135.
- Hu, Z.Q., Zhuang, W.M., Li, M., Liu, M.D., Wen, L.R., Li, C.Z., 2013. Dyes Pigments 98, 286-289.
- Mahapatra, A.K., Maji, R., Sahoo, P., Nandi, P.K., Mukhopadhyay, S.K., Banik, A., 2012. Tetrahedron Lett. 53, 7031-7035.
- Tang, B., Cui, L.J., Xu, K.H., Tong, L.L., Yang, G.W., An, L.G., 2008. ChemBioChem 9, 1159-1164.
- Vedamalai, M., Wu, S.P., 2012. Org. Biomol. Chem. 10, 5410-5416.
- Wang, Y., Geng, F., Xu, H., Qu, P., Zhou, X., Xu, M., 2012. J. Fluoresc. 22, 925-929.

Xiang, G., Cui, W., Lin, S., Wang, L., Meier, H., Li, L., Cao, D., 2013. *Sens. Actuators, B* 186, 741-749.

Ye, J.H., Duan, L., Yan, C., Zhang, W., He, W., 2012. *Tetrahedron Lett.* 53, 593-596.

Zhang, D., Li, M., Jiang, Y., Wang, C., Wang, Z., Ye, Y., Zhao, Y., 2013. *Dyes Pigments* 99, 607-612.

Zheng, H., Yan, M., Fan, X.X., Sun, D., Yang, S.Y., Yang, L.J., Li, J.D., Jiang, Y.B., 2012. *J. Chem. Soc., Chem. Commun.* 48, 2243-2245.
